# Supplementary material for: CLC-3 and SOX2 regulate the cell cycle in DU145 cells
Source: PubMed Central journal article supplement — Oncol Lett. 2020 Oct 21;20(6):372. doi: 10.3892/ol.2020.12235 (PMC7608052; doi:10.3892/ol.2020.12235), 2020-10-21
Supplement: Supplementary_Data.pdf [file Supplementary_Data.pdf]

Table SI. Tumor sizes.

| No.     | Day | 5           |            |                                       | 8           |            |                                       | 11          |            |                                       | 14          |            |                                       | 17          |            |                                       | 20          |            |                                       | 23          |            |                                       | 26          |            |                                       |
|---------|-----|-------------|------------|---------------------------------------|-------------|------------|---------------------------------------|-------------|------------|---------------------------------------|-------------|------------|---------------------------------------|-------------|------------|---------------------------------------|-------------|------------|---------------------------------------|-------------|------------|---------------------------------------|-------------|------------|---------------------------------------|
|         |     | Len-<br>gth | Wi-<br>dth | Tumor<br>volume<br>(mm <sup>3</sup> ) |
| Vehicle | 1   | 7.87        | 5.66       | 126.06                                | 7.95        | 7.11       | 200.94                                | 8.43        | 7.14       | 214.87                                | 9.99        | 7.13       | 253.93                                | 12.03       | 7.18       | 310.08                                | 13.76       | 7.84       | 422.88                                | 13.81       | 9.5        | 623.17                                | 16.17       | 10.07      | 819.85                                |
|         |     |             |            | 0086                                  |             |            | 45975                                 |             |            | 9014                                  |             |            | 03155                                 |             |            | 7686                                  |             |            | 3328                                  |             |            | 625                                   |             |            | 86165                                 |
|         | 2   | 7.61        | 5.52       | 115.93                                | 8.61        | 5.96       | 152.92                                | 8.95        | 6.5        | 189.06                                | 9.58        | 6.96       | 232.03                                | 10.86       | 7.7        | 321.94                                | 12.75       | 8.43       | 453.03                                | 13.68       | 9.77       | 652.89                                | 15.04       | 10.63      | 849.73                                |
|         |     |             |            | 9872                                  |             |            | 0488                                  |             |            | 875                                   |             |            | 5264                                  |             |            | 47                                    |             |            | 87375                                 |             |            | 7836                                  |             |            | 6688                                  |
|         | 3   | 8.88        | 4.65       | 96.00                                 | 9.09        | 5.86       | 156.07                                | 9.77        | 5.74       | 160.94                                | 9.65        | 6.26       | 189.08                                | 11.49       | 6.23       | 222.98                                | 11.51       | 8.22       | 388.85                                | 11.59       | 10.08      | 588.80                                | 11.71       | 11.47      | 770.28                                |
|         |     |             |            | 39                                    |             |            | 3482                                  |             |            | 9026                                  |             |            | 017                                   |             |            | 01105                                 |             |            | 6142                                  |             |            | 9088                                  |             |            | 90695                                 |
|         | 4   | 6.8         | 6.3        | 134.9                                 | 7.6         | 5.78       | 126.95                                | 7.38        | 6.05       | 135.06                                | 8.87        | 6.58       | 192.01                                | 9.5         | 6.96       | 230.09                                | 9.86        | 8.85       | 386.12                                | 11.72       | 10         | 586                                   | 12.54       | 11.01      | 760.05                                |
|         |     |             |            | 46                                    |             |            | 192                                   |             |            | 3225                                  |             |            | 9534                                  |             |            | 76                                    |             |            | 9925                                  |             |            | 0027                                  |             |            | 0027                                  |
|         | 5   | 8.5         | 5.78       | 141.98                                | 8.29        | 5.79       | 138.95                                | 8.5         | 5.76       | 141.0                                 | 9.55        | 5.93       | 167.91                                | 10.58       | 6.42       | 218.03                                | 10.84       | 8.25       | 368.89                                | 11.13       | 10.11      | 568.81                                | 12.36       | 11.09      | 760.06                                |
|         |     |             |            | 57                                    |             |            | 73945                                 |             |            | 048                                   |             |            | 23975                                 |             |            | 4756                                  |             |            | 875                                   |             |            | 03365                                 |             |            | 6458                                  |
|         | 6   | 10.86       | 4.93       | 131.97                                | 10.11       | 5.43       | 149.04                                | 10.23       | 5.47       | 153.04                                | 10.64       | 5.5        | 160.93                                | 11.28       | 5.65       | 180.04                                | 12.12       | 5.6        | 190.04                                | 12.5        | 7.9        | 390.06                                | 13.54       | 8.68       | 510.06                                |
|         |     |             |            | 5607                                  |             |            | 61695                                 |             |            | 54035                                 |             |            | 29                                    |             |            | 29                                    |             |            | 16                                    |             |            | 25                                    |             |            | 8048                                  |
|         | 7   | 7.35        | 5.19       | 98.99                                 | 7.88        | 5.7        | 128.01                                | 8.22        | 5.92       | 144.04                                | 8.93        | 6.08       | 165.05                                | 9.85        | 6.42       | 202.99                                | 11.08       | 6.73       | 250.92                                | 13.32       | 7.98       | 424.11                                | 13.82       | 9.06       | 567.19                                |
|         |     |             |            | 01675                                 |             |            | 06                                    |             |            | 0704                                  |             |            | 4976                                  |             |            | 077                                   |             |            | 2666                                  |             |            | 1464                                  |             |            | 7676                                  |
|         | 8   | 8.77        | 5.57       | 136.04                                | 9.24        | 6.43       | 191.01                                | 9.51        | 6.71       | 214.08                                | 9.73        | 6.95       | 234.99                                | 10.57       | 7.95       | 334.02                                | 12.6        | 8.81       | 488.98                                | 15.17       | 9.2        | 641.99                                | 17.06       | 10.1       | 870.14                                |
|         |     |             |            | 41865                                 |             |            | 3438                                  |             |            | 95955                                 |             |            | 16625                                 |             |            | 52125                                 |             |            | 143                                   |             |            | 44                                    |             |            | 53                                    |
|         | 9   | 9.76        | 4.96       | 120.05                                | 10.85       | 5.17       | 145.00                                | 11.19       | 5.16       | 148.97                                | 11.11       | 5.45       | 164.99                                | 12.77       | 5.83       | 217.01                                | 13.15       | 7.37       | 357.13                                | 15.99       | 8.59       | 589.93                                | 16.99       | 9.47       | 761.83                                |
|         |     |             |            | 5808                                  |             |            | 42825                                 |             |            | 0232                                  |             |            | 73875                                 |             |            | 91265                                 |             |            | 36175                                 |             |            | 58595                                 |             |            | 92455                                 |
|         | 10  | 6.72        | 6.34       | 135.05                                | 7.45        | 6.41       | 153.05                                | 7.67        | 6.42       | 158.06                                | 8.4         | 7.37       | 228.13                                | 8.62        | 7.4        | 236.01                                | 10.08       | 8.59       | 371.89                                | 12.42       | 9.91       | 609.87                                | 14.37       | 10.4       | 777.12                                |
|         |     |             |            | 7216                                  |             |            | 31725                                 |             |            | 4894                                  |             |            | 098                                   |             |            | 56                                    |             |            | 2024                                  |             |            | 2301                                  |             |            | 96                                    |
| DIDS    | 11  | 7.78        | 5.69       | 125.94                                | 7.88        | 5.61       | 124.00                                | 8           | 5.7        | 129.96                                | 8.47        | 5.89       | 146.92                                | 9.59        | 7          | 234.955                               | 7.75        | 7.22       | 201.99                                | 11.03       | 8.08       | 360.05                                | 10.14       | 8.25       | 345.07                                |
|         |     |             |            | 3029                                  |             |            | 0074                                  |             |            | 10435                                 |             |            | 755                                   |             |            | 755                                   |             |            | 755                                   |             |            | 4496                                  |             |            | 6875                                  |
|         | 12  | 9.83        | 4.94       | 119.94                                | 10.24       | 4.82       | 118.94                                | 10.81       | 4.75       | 121.95                                | 10.78       | 5.24       | 147.99                                | 11.02       | 5.32       | 155.94                                | 11.47       | 5.77       | 190.93                                | 11.35       | 5.98       | 202.94                                | 12.65       | 8.05       | 409.87                                |
|         |     |             |            | 3694                                  |             |            | 9888                                  |             |            | 03125                                 |             |            | 6464                                  |             |            | 6224                                  |             |            | 47815                                 |             |            | 027                                   |             |            | 58125                                 |
|         | 13  | 7.5         | 4.98       | 93.00                                 | 7.68        | 5.18       | 103.03                                | 7.62        | 5.2        | 103.02                                | 8.89        | 5.24       | 122.04                                | 9.22        | 5.31       | 129.98                                | 9.73        | 5.77       | 161.96                                | 10.2        | 6.73       | 230.99                                | 10.48       | 6.21       | 202.07                                |
|         |     |             |            | 15                                    |             |            | 6416                                  |             |            | 24                                    |             |            | 9032                                  |             |            | 4021                                  |             |            | 99585                                 |             |            | 379                                   |             |            | 5884                                  |
|         | 14  | 7.07        | 6.36       | 142.98                                | 7.19        | 6.24       | 139.98                                | 7.37        | 6.14       | 138.92                                | 7.25        | 6.26       | 142.05                                | 7.16        | 6.14       | 134.96                                | 7.68        | 6.96       | 186.01                                | 9.32        | 7.16       | 238.89                                | 9.68        | 7.9        | 302.06                                |
|         |     |             |            | 9336                                  |             |            | 0672                                  |             |            | 3026                                  |             |            | 505                                   |             |            | 4568                                  |             |            | 5744                                  |             |            | 7696                                  |             |            | 44                                    |
|         | 15  | 8.53        | 5.08       | 110.0                                 | 9.43        | 4.83       | 109.99                                | 9.88        | 4.97       | 122.02                                | 12.07       | 5.26       | 166.97                                | 11.41       | 4.9        | 136.97                                | 11.48       | 6.73       | 259.98                                | 11.84       | 7.5        | 333                                   | 12.15       | 7.71       | 361.12                                |
|         |     |             |            | 64296                                 |             |            | 57635                                 |             |            | 2446                                  |             |            | 3966                                  |             |            | 705                                   |             |            | 1246                                  |             |            | 0027                                  |             |            | 29075                                 |
|         | 16  | 9.05        | 5.36       | 130.0                                 | 9.68        | 5.28       | 134.93                                | 10.31       | 5.06       | 131.98                                | 10.45       | 5.62       | 165.02                                | 11.53       | 4.84       | 135.04                                | 12.55       | 4.89       | 150.04                                | 11.83       | 6.5        | 249.90                                | 13.11       | 8.23       | 443.98                                |
|         |     |             |            | 0144                                  |             |            | 1456                                  |             |            | 6558                                  |             |            | 849                                   |             |            | 8584                                  |             |            | 84275                                 |             |            | 875                                   |             |            | 91595                                 |

Table SI. Continued.

| No. | Day  | 5           |            |                                       | 8           |            |                                       | 11          |            |                                       | 14          |            |                                       | 17          |            |                                       | 20          |            |                                       | 23          |            |                                       | 26   |        |  |
|-----|------|-------------|------------|---------------------------------------|-------------|------------|---------------------------------------|-------------|------------|---------------------------------------|-------------|------------|---------------------------------------|-------------|------------|---------------------------------------|-------------|------------|---------------------------------------|-------------|------------|---------------------------------------|------|--------|--|
|     |      | Len-<br>gth | Wi-<br>dth | Tumor<br>volume<br>(mm <sup>3</sup> ) |      |        |  |
| 17  | 7.48 | 5.12        | 98.04      | 7.55                                  | 5.25        | 104.04     | 7.78                                  | 5.46        | 115.96     | 7.82                                  | 5.7         | 127.03     | 7.62                                  | 5.35        | 109.05     | 8.92                                  | 5.8         | 150.03     | 10.69                                 | 6.43        | 220.98     | 11.37                                 | 6.88 | 269.09 |  |
|     |      |             | 1856       |                                       |             | 84375      |                                       |             | 7124       |                                       |             | 59         |                                       |             | 1725       |                                       |             | 44         |                                       |             | 84905      |                                       |      | 6064   |  |
| 18  | 6.43 | 6.16        | 121.99     | 6.36                                  | 6.27        | 125.01     | 6.35                                  | 6.2         | 122.047    | 7.16                                  | 6.41        | 147.09     | 7.31                                  | 6.96        | 177.058    | 8                                     | 7.16        | 205.06     | 9.6                                   | 7.23        | 250.90     | 10.88                                 | 8.09 | 356.03 |  |
|     |      |             | 5104       |                                       |             | 5022       |                                       |             | 5398       |                                       |             | 5398       |                                       |             | 404        |                                       |             | 24         |                                       |             | 992        |                                       |      | 7664   |  |
| 19  | 8.38 | 5.82        | 141.92     | 8.44                                  | 5.76        | 140.00     | 9.18                                  | 5.62        | 144.97     | 10.44                                 | 5.69        | 169.00     | 11.86                                 | 5.85        | 202.93     | 12.37                                 | 6.28        | 243.92     | 14.69                                 | 7.05        | 365.06     | 16.09                                 | 7.62 | 467.12 |  |
|     |      |             | 5356       |                                       |             | 9472       |                                       |             | 2396       |                                       |             | 3242       |                                       |             | 9425       |                                       |             | 6504       |                                       |             | 48625      |                                       |      | 8098   |  |
| 20  | 7.05 | 5.71        | 114.92     | 6.69                                  | 5.94        | 118.02     | 6.94                                  | 5.88        | 119.97     | 7.37                                  | 6.23        | 143.02     | 7.58                                  | 5.9         | 131.92     | 7.68                                  | 6.27        | 150.96     | 11.8                                  | 6.31        | 234.91     | 12.29                                 | 6.81 | 284.98 |  |
|     |      |             | 94525      |                                       |             | 3642       |                                       |             | 3168       |                                       |             | 55365      |                                       |             | 99         |                                       |             | 1536       |                                       |             | 499        |                                       |      | 11345  |  |
